---

## Statement of Ownership, Management, and Circulation Focus

---

|                                                                                                                                                                                                                                                                                                                                                                                                                                                                                                                                                                                                                       |                                                                                                                                                                                                                                                                                                                                                                                                                                                                                                                                                                     |
|-----------------------------------------------------------------------------------------------------------------------------------------------------------------------------------------------------------------------------------------------------------------------------------------------------------------------------------------------------------------------------------------------------------------------------------------------------------------------------------------------------------------------------------------------------------------------------------------------------------------------|---------------------------------------------------------------------------------------------------------------------------------------------------------------------------------------------------------------------------------------------------------------------------------------------------------------------------------------------------------------------------------------------------------------------------------------------------------------------------------------------------------------------------------------------------------------------|
| <p>Publication number: 1541-4094<br/>         Filing date: September 27, 2007<br/>         Issue frequency: quarterly<br/>         No. of issues published annually: 4<br/>         Annual subscription price: \$423.00<br/>         Address where published, and name and headquarters address of publisher:<br/>         American Psychiatric Publishing, Inc., 1000 Wilson Blvd., Suite 1825, Arlington, VA 22209<br/>         Contact: Roger Domras, (703) 907-8544<br/>         Editor: Deborah Hales, M.D., and Mark Rapaport, M.D., above address<br/>         Managing Editor: Michael Roy, above address</p> | <p>Publication name: <i>Focus: The Journal of Lifelong Learning in Psychiatry</i><br/>         Issue date for circulation data below: July 1, 2007<br/>         Owner: American Psychiatric Association, 1000 Wilson Blvd., Suite 1825, Arlington, VA 22209<br/>         Known bondholders, mortgagees, and other security holders owning or holding 1% or more of total amount of bonds, mortgages, or other securities: none<br/>         Purpose, function, and nonprofit status for federal income tax purposes: has not changed during preceding 12 months</p> |
|-----------------------------------------------------------------------------------------------------------------------------------------------------------------------------------------------------------------------------------------------------------------------------------------------------------------------------------------------------------------------------------------------------------------------------------------------------------------------------------------------------------------------------------------------------------------------------------------------------------------------|---------------------------------------------------------------------------------------------------------------------------------------------------------------------------------------------------------------------------------------------------------------------------------------------------------------------------------------------------------------------------------------------------------------------------------------------------------------------------------------------------------------------------------------------------------------------|

---

### Circulation

---

|                                                                                                      | Average No. Copies<br>Each Issue During<br>Preceding 12 Months | Actual No. Copies of<br>Single Issue Published<br>Nearest to Filing Date |
|------------------------------------------------------------------------------------------------------|----------------------------------------------------------------|--------------------------------------------------------------------------|
| Total no. copies (net press run)                                                                     | 2,782                                                          | 2,650                                                                    |
| Paid and/or requested circulation                                                                    |                                                                |                                                                          |
| Paid/requested outside-county mail subscriptions                                                     | 1,405                                                          | 1,332                                                                    |
| Paid in-county subscriptions                                                                         | 0                                                              | 0                                                                        |
| Sales through dealers, carriers, street vendors, counter sales, and other non-USPS paid distribution | 56                                                             | 66                                                                       |
| Other classes mailed through the USPS                                                                | 0                                                              | 0                                                                        |
| Total                                                                                                | 1,461                                                          | 1,398                                                                    |
| Free distribution by mail                                                                            |                                                                |                                                                          |
| Outside-county                                                                                       | 285                                                            | 503                                                                      |
| In-county                                                                                            | 0                                                              | 0                                                                        |
| Other classes mailed through the USPS                                                                | 0                                                              | 0                                                                        |
| Free distribution outside the mail                                                                   | 237                                                            | 159                                                                      |
| Total free distribution                                                                              | 522                                                            | 662                                                                      |
| Total distribution                                                                                   | 1,983                                                          | 2,060                                                                    |
| Copies not distributed                                                                               | 799                                                            | 590                                                                      |
| Total                                                                                                | 2,782                                                          | 2,650                                                                    |
| Percent paid and/or requested circulation                                                            | 74%                                                            | 68%                                                                      |

I certify that all information furnished on this form is true and complete. I understand that anyone who furnishes false or misleading information on this form or who omits material or information requested on the form may be subject to criminal sanctions (including fines and imprisonment) and/or civil sanctions (including civil penalties). Signed by Kathy Stein, September 27, 2007.

---
