*Ethics, Professionalism, and End of Life Care*

**FOCUS**

THE JOURNAL OF LIFELONG LEARNING IN PSYCHIATRY

Fall 2007, Volume V, Number 4

# FOCUS

THE JOURNAL OF LIFELONG LEARNING IN PSYCHIATRY

## *Ethics, Professionalism, and End of Life Care*

*Guest Editor, Michael D. Jibson, M.D., Ph.D.*

### IN CLINICAL SYNTHESIS:

Clinical and Ethical Issues in Palliative Care

*Susan D. Block, M.D.*

Interactions Between Physicians and Industry: A Guide for Clinicians

*Michael D. Jibson, M.D., Ph.D.*

A Cautionary Tale About Boundary Violations in Psychodynamic Psychotherapy and  
Psychoanalysis

*Warren R. Procci, M.D.*

AND INFLUENTIAL PUBLICATIONS . . .
